# Supplementary material for: Synthesis and application of fatty acid derived templates for the preparation of mesostructured silica material
Source: Royal Society of Chemistry journal article supplement (doi:10.1039/c5ra19495d), 2015-01-01
Supplement: c5ra19495d1.pdf [file c5ra19495d1.pdf]

## Synthesis and application of fatty acid derived templates for the preparation of mesostructured silica material

C. Pirez<sup>a\*</sup>, G. Stoclet<sup>c</sup>, T. Lebarbé<sup>d</sup>, S. Desset<sup>a</sup>, F. Dumeignil<sup>a</sup> and B. Katryniok<sup>a,b\*</sup>

*a-Université Lille Nord de France, CNRS UMR8181, Unité de Catalyse et Chimie du Solide, 59655 Villeneuve d'Ascq Cedex (France)*

*b-Ecole Centrale de Lille 59655 Villeneuve d'Ascq (France)*

*c-Université Lille Nord de France, CNRS UMR8207, Unité Matériaux et Transformations, 59655 Villeneuve d'Ascq Cedex (France)*

*d- ITERG- Institut des Corps Gras, 33600 Pessac (France)*

*\*Corresponding author: E-mail: Benjamin.katryniok@ec-lille.fr*

### ***S1. Imidazole-Fatty acid synthesis***

---

A mixture of FAME (1eq), 1-(3-aminopropyl)imidazole (1.5eq) and TBD (2mol%) was stirred in a round-bottom flask at 120°C under reduced pressure (10mbar) for 5h. After completion of the reaction, the excess amine was removed by washing the product with water and subsequently dried under vacuum. The FAME imidazole amides were obtained as viscous liquid products. Products have been analysed by <sup>1</sup>H NMR in CDCl<sub>3</sub>.

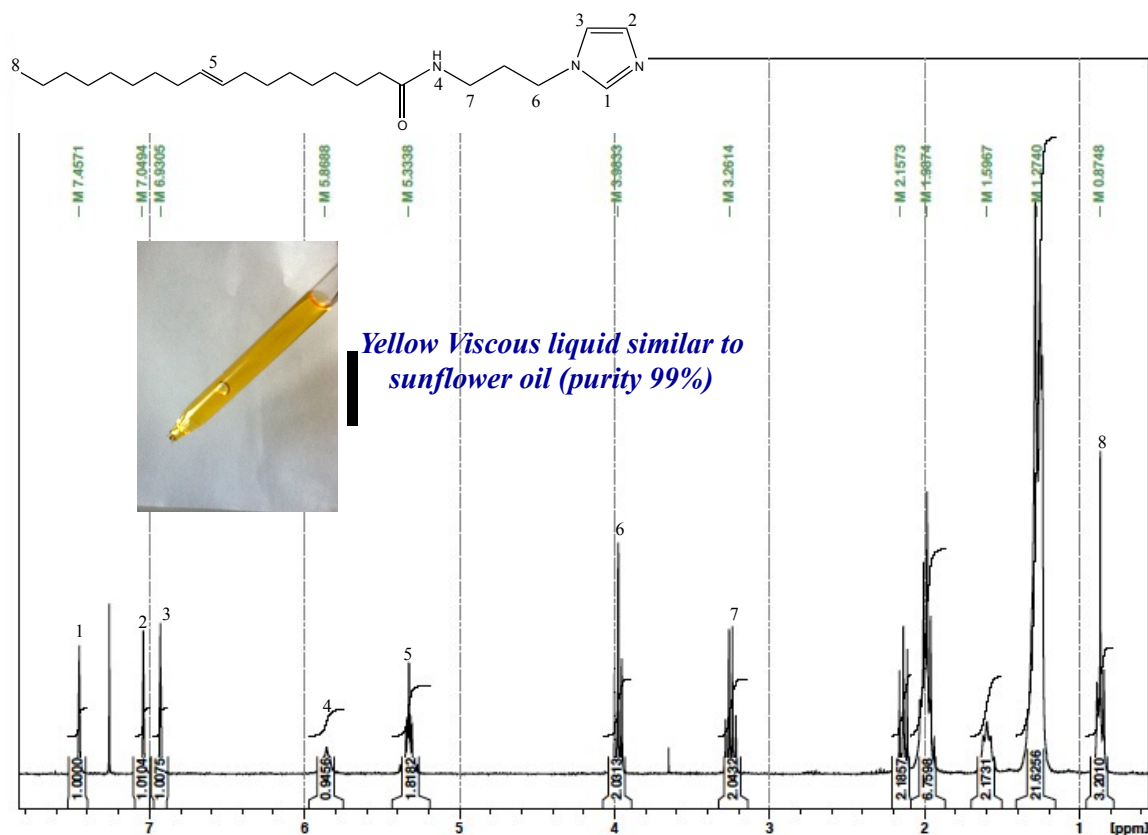

Fig.S1.  $^1\text{H}$  NMR of Fatty Oleic Imidazole

- Very High Oleic Sunflower (VHOSO) imidazole amide

Conversion in amide product measured by GC = 94%

$^1\text{H-NMR}$  (400 MHz,  $\text{CDCl}_3$ , d): 0.87 (m,  $-\text{CH}_2-\text{CH}_3$ ), 1.27 (m,  $-\text{[CH}_2\text{]-}$ ), 1.6 (m,  $-\text{CH}_2-\text{CH}_2-\text{NHOC-}$ ), 1.99 (m,  $-\text{CH}_2-\text{CH=}$ ), 2.16 (t,  $-\text{CH}_2-\text{CONH-}$ ), 3.26 (q,  $-\text{CH}_2-\text{NHCO-}$ ), 3.98 (t,  $-\text{CH}_2-\text{N}<$ ), 5.33 (m,  $-\text{CH=CH-}$ ), 5.87 (m,  $-\text{NH-CO-}$ ), 6.93 (s,  $-\text{CH=CH-N}<$ ), 7.05 (s,  $=\text{N-CH=CH-}$ ), 7.46 (s,  $-\text{N=CH-N}<$ )

- Linseed imidazole amide

Conversion in amide product measured by GC = 93%

$^1\text{H-NMR}$  (400 MHz,  $\text{CDCl}_3$ , d): 0.87 (m,  $-\text{CH}_2-\text{CH}_3$ ), 0.95 (m,  $=\text{CH-CH}_2-\text{CH}_3$ ), 1.30 (m,  $-\text{[CH}_2\text{]-}$ ), 1.56 (m,  $-\text{CH}_2-\text{CH}_2-\text{NHOC-}$ ), 1.90 (m,  $-\text{CH}_2-\text{CH=}$ ), 2.10 (t,  $-\text{CH}_2-\text{CONH-}$ ), 2.80 (m,  $=\text{CH-CH}_2-\text{CH=}$ ), 3.20 (q,  $-\text{CH}_2-\text{NHCO-}$ ), 4.00 (t,  $-\text{CH}_2-\text{N}<$ ), 5.20 (m,  $-\text{CH=CH-}$ ), 5.50-6.50 (m,  $-\text{CH=CH-CH}_2-\text{CH=CH-}$ ), 6.00 (m,  $-\text{NH-CO-}$ ), 6.90 (s,  $-\text{CH=CH-N}<$ ), 7.10 (s,  $=\text{N-CH=CH-}$ ), 7.50 (s,  $-\text{N=CH-N}<$ )

### - Castor oil imidazole amide

Conversion in amide product measured by GC = 95%

$^1\text{H-NMR}$  (400 MHz,  $\text{CDCl}_3$ , d): 0.87 (m,  $-\text{CH}_2-\text{CH}_3$ ), 1.30 (m,  $-\text{[CH}_2\text{]-}$ ), 1.56 (m,  $-\text{CH}_2-\text{CH}_2-\text{NHOC-}$ ), 1.90 (m,  $-\text{CH}_2-\text{CH=}$ ), 2.10 (t,  $-\text{CH}_2-\text{CONH-}$ ), 2.20 (m,  $-\text{CH}_2-\text{CH=}$ ), 3.20 (q,  $-\text{CH}_2-\text{NHCO-}$ ), 3.60 (m,  $-\text{CH}_2-\text{CH-OH}$ ), 4.00 (t,  $-\text{CH}_2-\text{N}<$ ), 5.30-5.60 (m,  $-\text{CH}_2-\text{CH=CH-CH}_2-$ ), 6.00 (m,  $-\text{NH-CO-}$ ), 6.90 (s,  $-\text{CH=CH-N}<$ ), 7.10 (s,  $=\text{N-CH=CH-}$ ), 7.50 (s,  $-\text{N=CH-N}<$ )

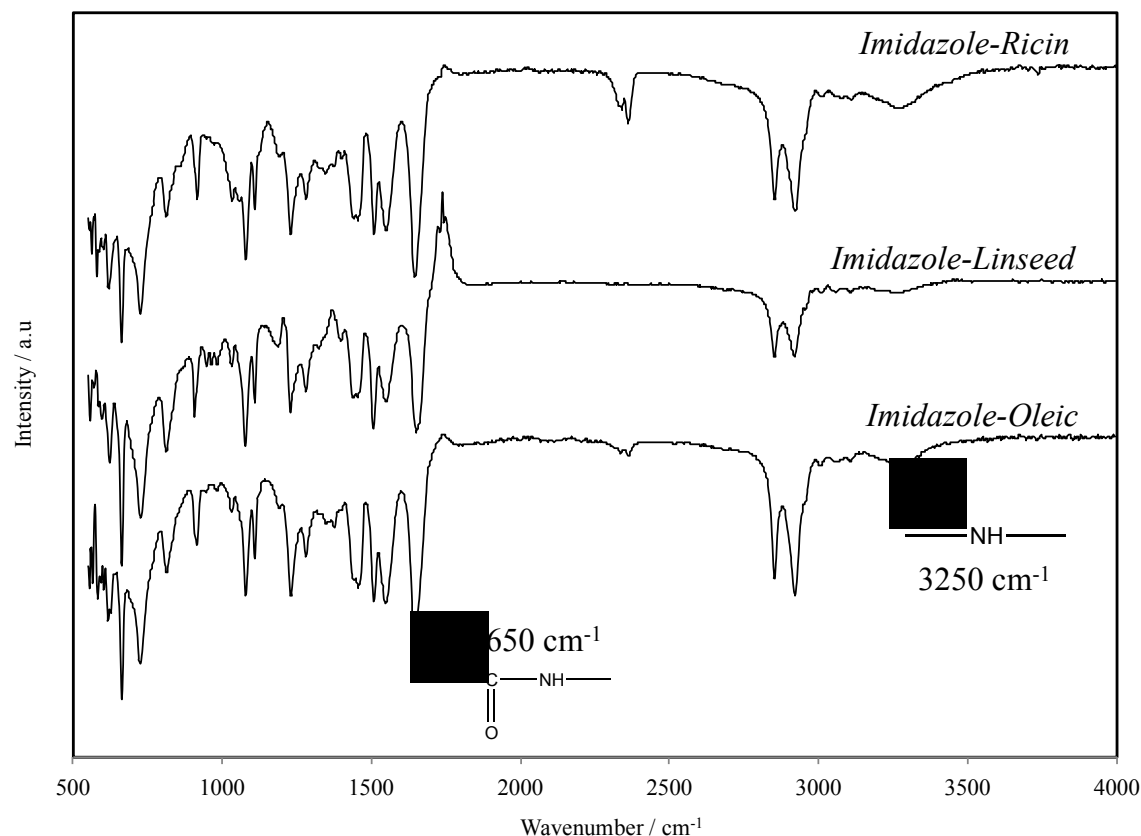

Fig. S2. Infrared spectra of fatty imidazole synthesized

### **S2. Bio-Organic Salt (BOS) synthesis**

3 or 4 g of fatty imidazole are introduced in Teflon autoclave (25ml). Large excess chloropropane is added to ensure complete dissolution of the fatty imidazole. The solution is stirred at  $80^\circ\text{C}$  for 24h. After cooling down the solution. The excess of chloropropane is removed by evaporation. Products have been analysed by  $^1\text{H NMR}$  in  $\text{CDCl}_3$  and show complete conversion of Fatty-imidazole to imidazolium salt. After, evaporation of the excess of chloropropane, the products showed high purity.

Very High Oleic Sunflower imidazolium salt (BOS-Oleic)

$^1\text{H-NMR}$  (400 MHz,  $\text{CDCl}_3$ , d): 0.87 (m,  $-\text{CH}_2-\text{CH}_3$ ), 0.97 (t,  $-\text{CH}_2-\text{CH}_3$ ), 1.26 (m,  $-\text{[CH}_2\text{]-}$ ), 1.58 (m,  $-\text{CH}_2-\text{CH}_2-\text{NHOC-}$ ), 1.95 (m,  $-\text{CH}_2-\text{CH=}$ ), 2.15 (t,  $-\text{CH}_2-\text{CONH-}$ ), 3.26 (q,  $-\text{CH}_2-\text{NHCO-}$ ), 4.22 (t,  $-\text{CH}_2-\text{N}<$ ), 4.42 (s,  $-\text{CH}_2-\text{CH}_2-\text{N}<$ ), 5.29 (m,  $-\text{CH=CH-}$ ), 7.27 (s,  $-\text{CH=CH-N}<$ ), 7.66 (s,  $=\text{N-CH=CH-}$ ), 8.28 (m,  $-\text{NH-CO-}$ ), 10.35 (s,  $-\text{N=CH-N}<$ )

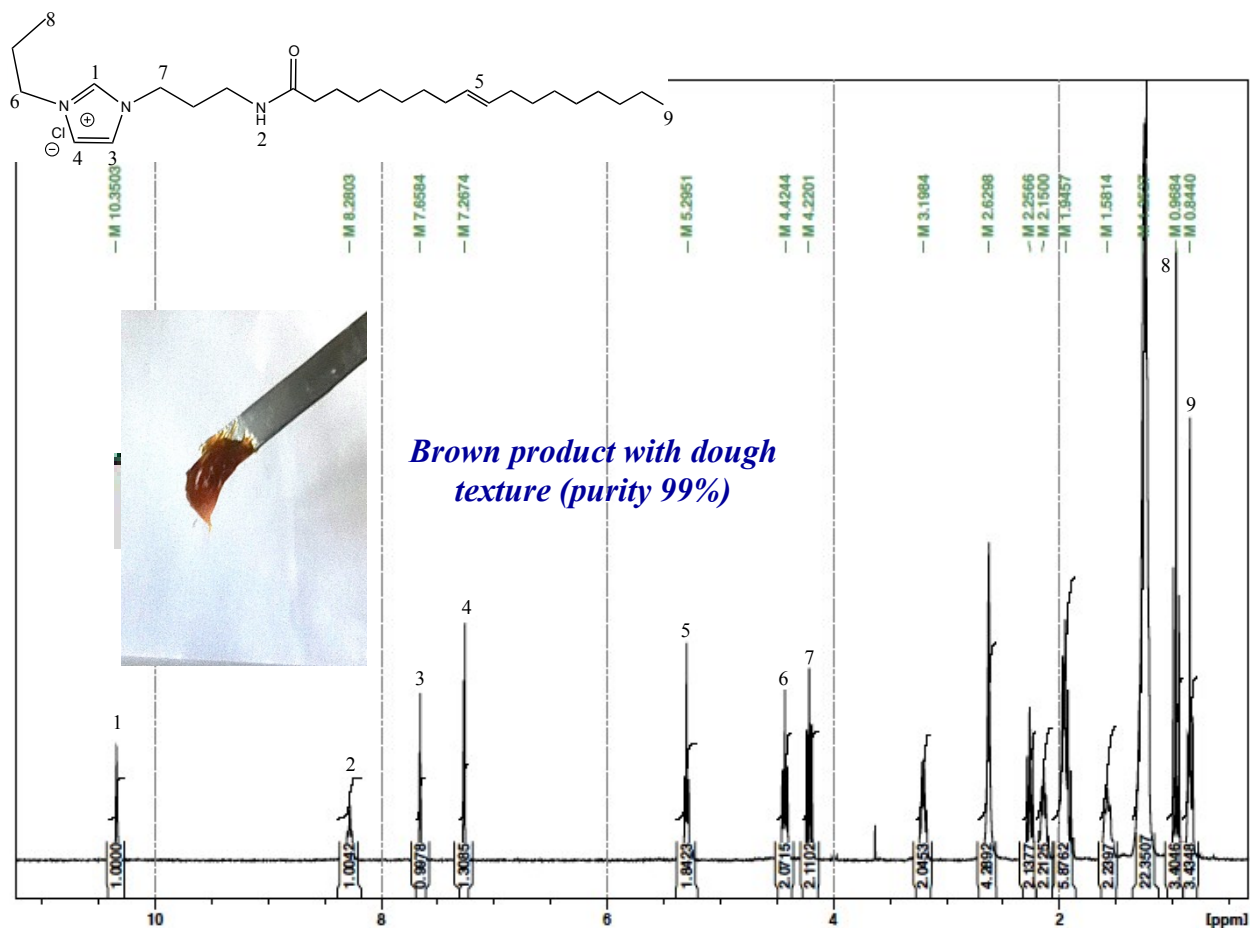

Fig.S3.  $^1\text{H}$  NMR of BOS-Oleic

Linseed imidazolium salt (BOS-Linseed)

$^1\text{H-NMR}$  (400 MHz,  $\text{CDCl}_3$ , d): 0.85 (m,  $-\text{CH}_2-\text{CH}_3$ ), 0.97 (m,  $-\text{CH}_2-\text{CH}_3$  /  $=\text{CH}-\text{CH}_2-\text{CH}_3$ ), 1.27 (m,  $-\text{[CH}_2\text{]-}$ ), 1.58 (m,  $-\text{CH}_2-\text{CH}_2-\text{NHOC-}$ ), 1.95 (m,  $-\text{CH}_2-\text{CH=}$ ), 2.10 (t,  $-\text{CH}_2-\text{CONH-}$ ), 2.77 (m,  $=\text{CH}-\text{CH}_2-\text{CH=}$ ), 3.18 (q,  $-\text{CH}_2-\text{NHCO-}$ ), 4.2 (t,  $-\text{CH}_2-\text{N}<$ ), 4.42 (s,  $-\text{CH}_2-\text{CH}_2-\text{N}<$ ), 5.30 (m,  $-\text{CH=CH-}$ ), 5.50-6.50 (m,  $-\text{CH=CH-CH}_2-\text{CH=CH-}$ ), 7.28 (s,  $-\text{CH=CH-N}<$ ), 7.66 (s,  $=\text{N-CH=CH-}$ ), 8.47 (m,  $-\text{NH-CO-}$ ), 10.56 (s,  $-\text{N=CH-N}<$ )

### Castor oil imidazolium salt (BOS-Ricin)

$^1\text{H-NMR}$  (400 MHz,  $\text{CDCl}_3$ ,  $d$ ): 0.84 (m,  $-\text{CH}_2-\text{CH}_3$ ), 0.96 (m,  $-\text{CH}_2-\text{CH}_3$ ), 1.28 (m,  $-\text{[CH}_2\text{]-}$ ), 1.43 (m,  $-\text{CH}_2-\text{CH}_2-\text{NHOC-}$ ), 1.57 (m,  $-\text{CH}_2-\text{CH=}$ ), 1.94 (t,  $-\text{CH}_2-\text{CONH-}$ ), 2.26 (m,  $-\text{CH}_2-\text{CH=}$ ), 3.17 (q,  $-\text{CH}_2-\text{NHCO-}$ ), 3.57 (m,  $-\text{CH}_2-\text{CH-OH}$ ), 4.21 (t,  $-\text{CH}_2-\text{N}<$ ), 4.18 (s,  $-\text{CH}_2-\text{CH}_2-\text{N}<$ ), 5.42 (m,  $-\text{CH}_2-\text{CH=CH-CH}_2-$ ), 7.29 (s,  $-\text{CH=CH-N}<$ ), 7.68 (s,  $=\text{N-CH=CH-}$ ), 8.42 (m,  $-\text{NH-CO-}$ ), 10.35 (s,  $-\text{N=CH-N}<$ )

### **S3. Silica material synthesis using BOS as biotemplate**

In a Teflon autoclave, Xg of Bio-Organic Salt was dissolved in 17.4ml of distillate water. Then, after complete dissolution of the template, 2.6 ml of  $\text{NH}_3$  (26wt%) and 2.2 ml of TetraEthoxyOrthoSilica (TEOS, silica precursor) was added in the solution. The mixture is stirred for 24h at room temperature. The materials were filtered and dried at room temperature for one night. All the materials were calcined at  $550^\circ\text{C} - 1^\circ\text{C}/\text{min} - 6\text{h}$ .

#### *S3.1. Characterization*

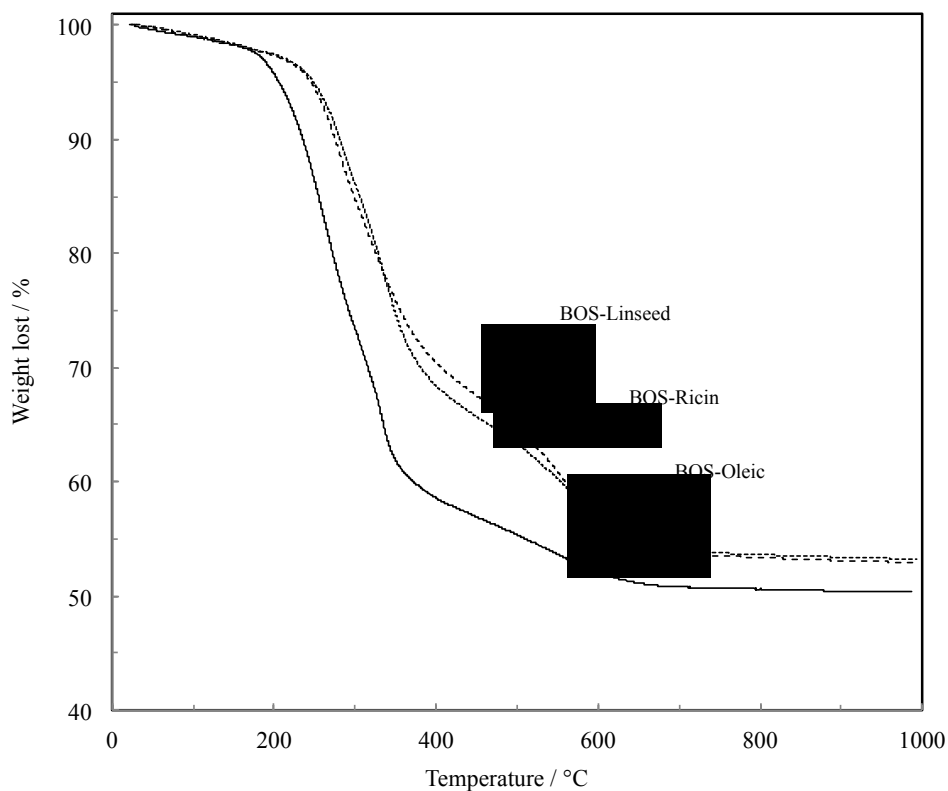

Fig.S4. Thermogravimetry analysis of Meso-BOS silica materials uncalcined

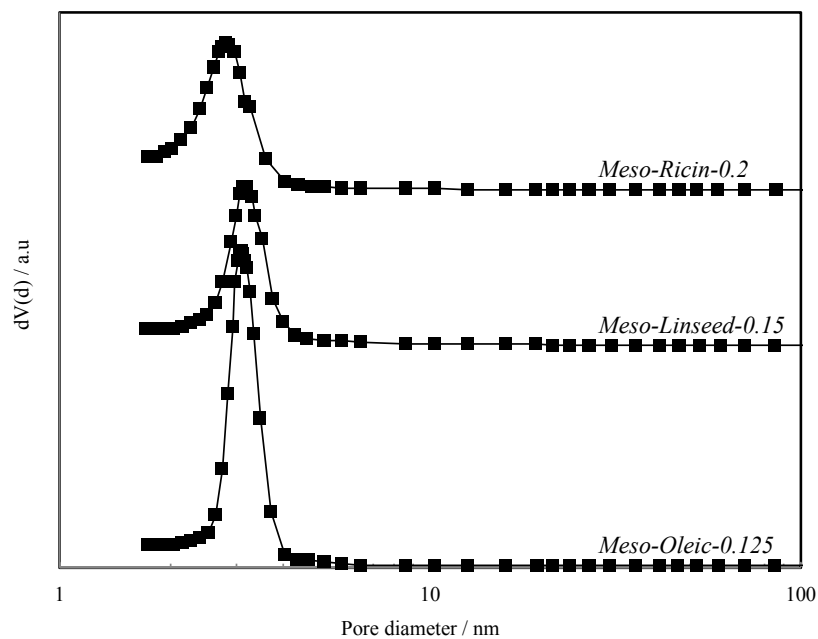

Fig. S5. Pore size distribution of Meso-BOS-X from adsorption branch

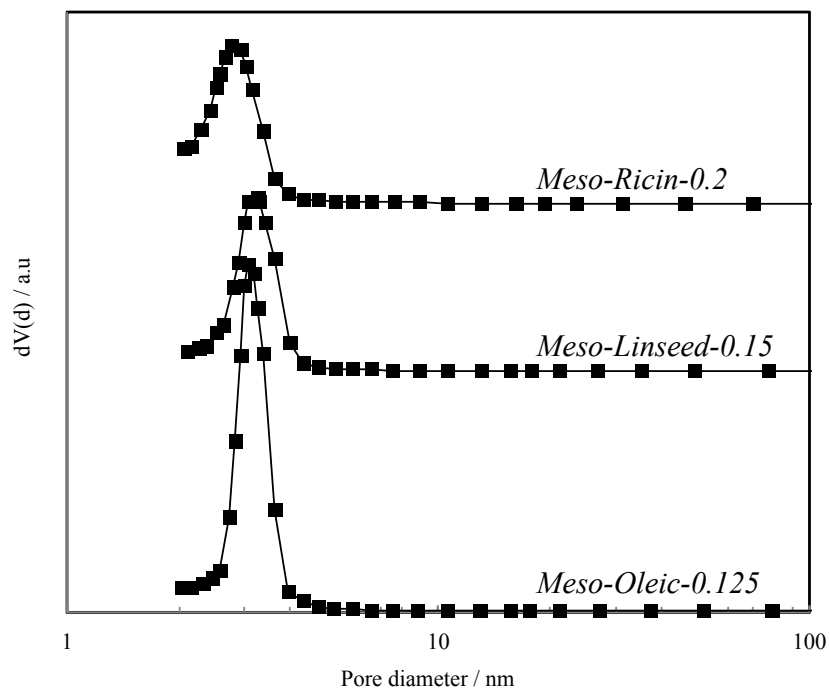

Fig. S6. Pore size distribution of Meso-BOS-X from desorption branch

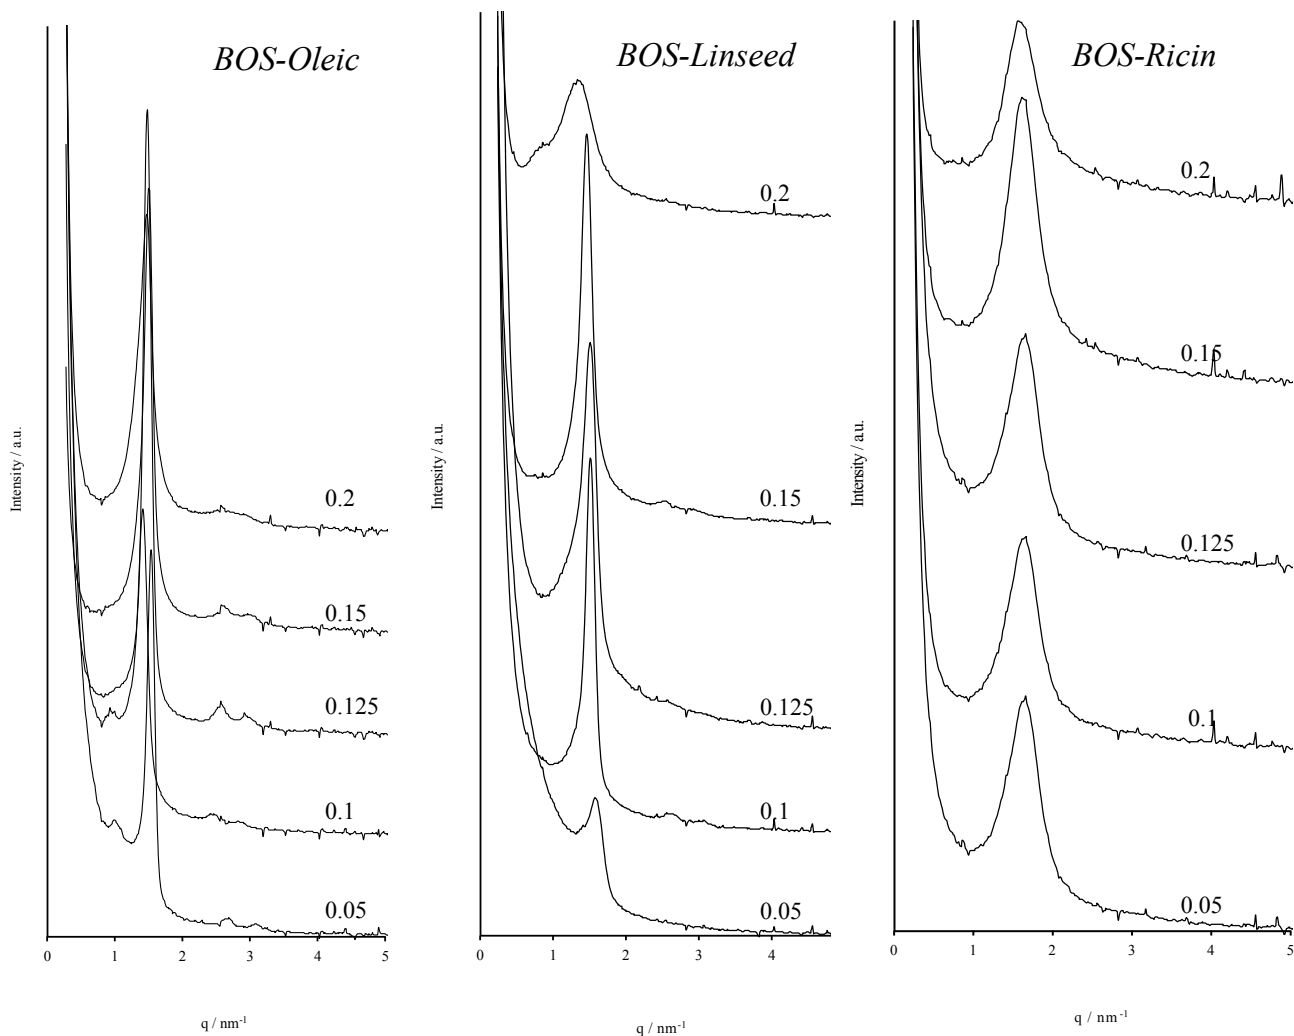

Fig.S7. SAXS Intensity profiles of Meso-BOS-X in varying BOS/TEOS molar ratio (X)

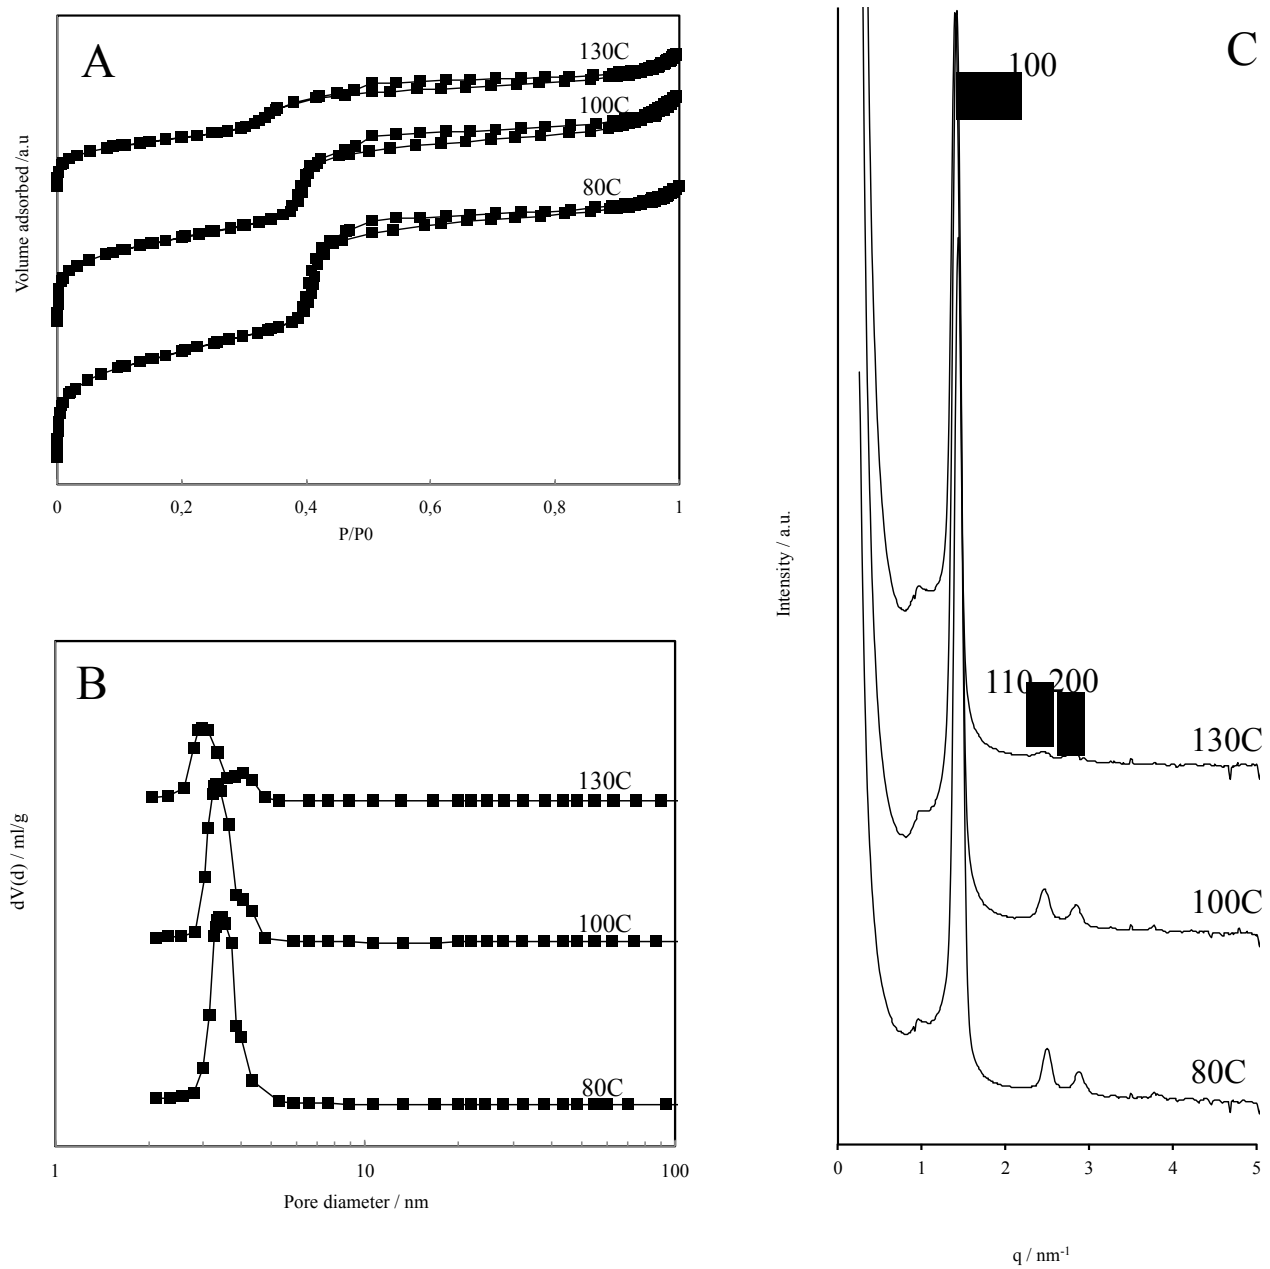

Fi

g. S8. Textural and structural analysis of Meso-Oleic-0.125 synthesized with different hydrothermal temperature; A- N<sub>2</sub>-Adsorption-desorption, B- Pore size distribution (desorption branch), C- SAXS patterns

Table S1. Textural and structural properties of the mesostructured silica material prepared with Bio-Oleic as template for different hydrothermal temperatures

| Hydrothermal temperature / °C | BET / m <sup>2</sup> .g <sup>-1</sup> | V <sub>p</sub> / cm <sup>3</sup> .g <sup>-1</sup> | W <sub>BJH</sub> / nm | d spacing / nm | Unit cell parameter / nm | Wall thickness / nm |
|-------------------------------|---------------------------------------|---------------------------------------------------|-----------------------|----------------|--------------------------|---------------------|
| 80                            | 952                                   | 1,01                                              | 3,7                   | 4,40           | 5,10                     | 1,70                |
| 100                           | 823                                   | 0,89                                              | 3,8                   | 4,40           | 5,10                     | 1,30                |
| 130                           | 549                                   | 0,58                                              | 3,7                   | 4,50           | 5,10                     | 1,40                |



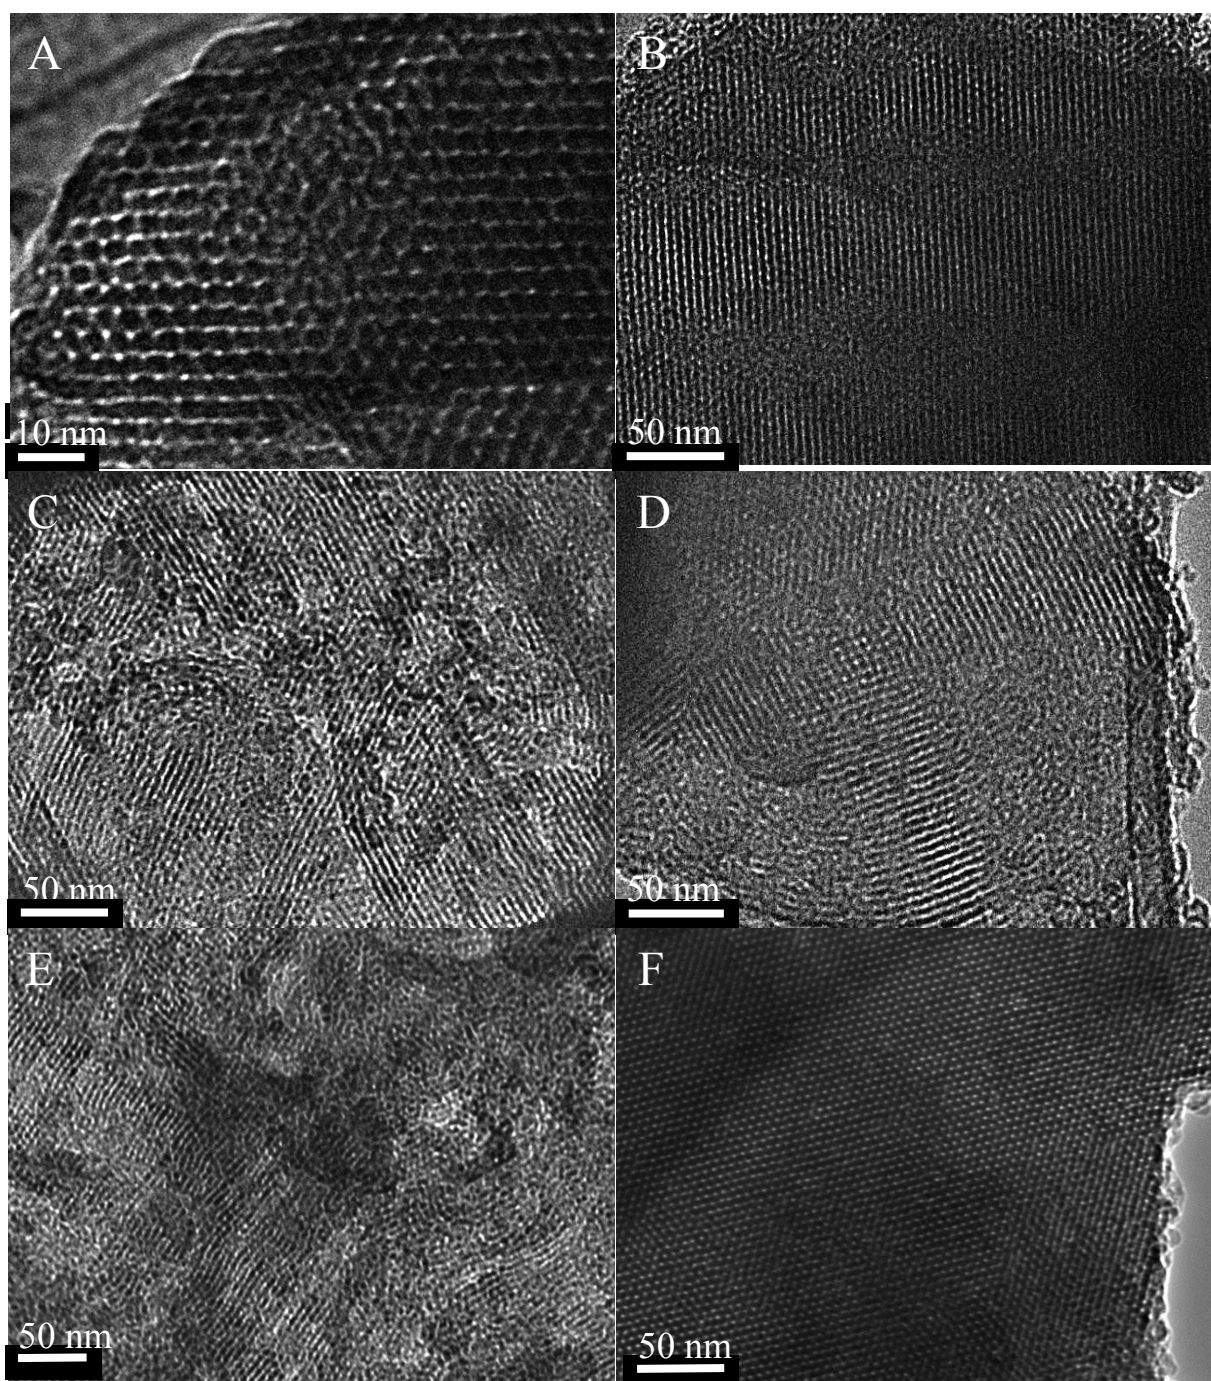

Fig.S9. TEM pictures of the Meso-Oleic-125 synthesized in basic media with different hydrothermal temperature (HT) for one day; A/B-HT 80C, C/D HT 100C, E/F-HT 130C
